# Supplementary material
Source: Research Square preprint supplement (doi:10.21203/rs.3.rs-8943807/v1)
Supplement: Supplementary file 1 [file 1a3e82fca2ddf5ade60903a9.docx]

**Study Questionnaire**

Title: The Role of Social Mobilization Activities Implemented by the Syria Immunization Group in Increasing Vaccination Demand in Northwest Syria

1. Date_____, Governorate_____, District_____, Subdistrict_____, Community______, interviewer code ______, interview number______
2. Do you have a child under 5 years old? ( Y / N )

If yes:

| Number | Question | Response | skip |
| --- | --- | --- | --- |
| **A. Demographic information** | |  |  |
| A1-1 | How many children do you have (Under 18y) | Total_____ |  |
| A1-2 | how many children under 5 years? | under 5 years_________ |  |
| A2 | What is the degree of relationship between you and the child? | Mother, Father, grandmother, grandfather, other______ |  |
| A3 | What is the family ethnicity? | Arabic, Kurd, Turkish, Other |  |
| A4 | What languages do you speak? | Arabic Kurdish Turkish Other languages: _____ |  |
| A5 | What is your residency type? | Host community displaced Other_____ |  |
| A5-1 | If displaced: How many times have you moved because of conflict | times moved_______ |  |
| A6 | What best characterizes the area where you live? | Urban, rural, camp |  |
| A7 | How would you describe your living arrangement? | house, tent, apartment, caravan, Other |  |
| A8 | What is the distance between the household and the vaccination point/ the nearest health facilities? | Less than 1Km , 1- <2 Km , 2- <5km, 5-<10km, 10 and more |  |
| A9 | What is child`s mother age? | years_________ |  |
| A10 | What is child`s father age? | years_________ |  |
| A11 | What is your sex? | M____ F___ |  |
| A12 | Marital status? | Single – married – divorced - widowed |  |
| A13 | Education level for the child`s mother? | Illiterate  Primary  Secondary  Diploma and above |  |
| A14 | Education level for the child`s father? | Illiterate  Primary  Secondary  Diploma and above |  |
| A15 | How many adults live in your house | Adults_____ |  |
| A16 | Date of childbirth |  |  |
| A17 | What is your child`s sex? | M____ F___ |  |
| A18 | What is the Childbirth order in his family? | 1, 2, 3 and more |  |
| A19 | Do you have a smartphone at home? | (Y, N) |  |
| A20 | Do you have internet access? | (Y, N) |  |
| A21 | Do you know how to use social media platforms? | (Y,N) |  |
| A22 | Do you have electricity at home? | (Y, N) |  |
| A23 | Do you have a television at home? | (Y, N) |  |
| **B. Employment** | |  |  |
| B1 | Does the child's mother work? | Yes or No |  |
| B2 | If Yes, what is the current occupation? | Farmer  Employee  Health worker  Daily labor worker  others |  |
| B3 | If work, how would you describe this work? | Full time 1  Half time 2  Less than half time 3  Retired or disabled 4 |  |
| B4 | Does the child's father work? | (Y, N) |  |
| B5 | If Yes, what is the current occupation? | Farmer  Employee  Health worker  Daily labor worker  others |  |
| B6 | If work, how would you describe this work? | Full time 1  Half time 2  Less than half time 3  Retired or disabled 4 |  |
| B7 | Can you describe the family economic status? | a) Income is higher than spending b) Income is lower than spending c) Income equals spending. |  |
| **C. The Vaccination status:** | |  |  |
| Vaccine type | C1- Has the child received the vaccine? | Source of the answer (1-Verbal, 2-SIG card, 3-another card) | The date of the dose( if there is a card) |
| BCG |  |  |  |
| OPV1 |  |  |  |
| Penta1 |  |  |  |
| IPV1 |  |  |  |
| OPV2 |  |  |  |
| Penta2 |  |  |  |
| IPV2 |  |  |  |
| OPV3 |  |  |  |
| Penta3 |  |  |  |
| MMR1 |  |  |  |
| OPV 4 |  |  |  |
| Penta booster |  |  |  |
| MMR2 |  |  |  |
| **D. Vaccination knowledge sources:** | |  |  |
| D1 | How did you become aware of the vaccination? |  |  |
| 1 | TV/ Radio |  |  |
| 2 | Awareness sessions |  |  |
| 3 | school activities. |  |  |
| 4 | local councils and Community leaders |  |  |
| 5 | Religious leaders / the mosque |  |  |
| 6 | The health staff |  |  |
| 7 | House visit from vaccination staff |  |  |
| 8 | Flyers and brochures |  |  |
| 9 | Road banner |  |  |
| 10 | Bread cards |  |  |
| 11 | Internet /website |  |  |
| 12 | WhatsApp |  |  |
| 13 | Facebook |  |  |
| 14 | Telegram |  |  |
| 15 | Other sources - Write the sources |  |  |
| **E. Reasons for being un-vaccination:** | |  |  |
| E1 | If the answer to Item C is: No; ask the reason why the child is not immunized as per the immunization schedule : |  |  |
| 1 | Unaware of the need for immunization |  |  |
| 2 | Unaware of the need to return for 2nd or 3rd dose. |  |  |
| 3 | Place and/or time of immunization unknown. |  |  |
| 4 | Rumors |  |  |
| 5 | Fear of side effects |  |  |
| 6 | Wrong ideas about contraindications |  |  |
| 7 | Postponed until another time. |  |  |
| 8 | No faith in immunization |  |  |
| 9 | Encouraged not to go – friends, elders, religious leaders, etc |  |  |
| 10 | The place of immunization is too far. |  |  |
| 11 | The time of immunization inconvenient |  |  |
| 12 | Vaccinator absent |  |  |
| 13 | Vaccinator not/inadequately trained. |  |  |
| 14 | Vaccinator impolite |  |  |
| 15 | Vaccine not available/out of stock |  |  |
| 16 | Child ill – brought but not immunized. |  |  |
| 17 | Child ill – not brought.' |  |  |
| 18 | Long waiting time |  |  |
| 19 | There is no female on the EPI team. |  |  |
| 20 | Mother too busy (in the garden, at work, at the funeral) |  |  |
| 21 | Mother ill |  |  |
| 22 | Poverty – not able to afford fees, transport, etc. |  |  |
| 23 | Family refused – father, grandparent, etc. |  |  |
| 24 | Other reasons (not directly related to the reasons given above) - Write the reason |  |  |

End of the Questionnaire
